# Supplementary material
Source: Springer Nature journal article supplement (https://www.springermedizin.de/resource/supplementary/12943_2011_1009_MOESM1_ESM.pdf/9552100)

## Human Glioblastoma Tissue Microarray Galectin-1 Immunostain

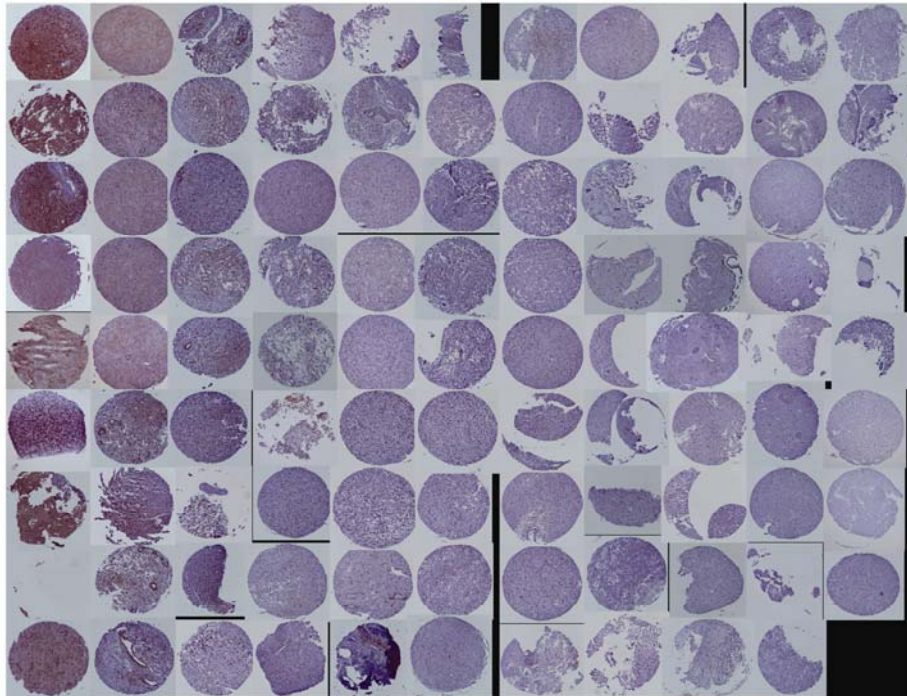

Arranged by intensity of stain

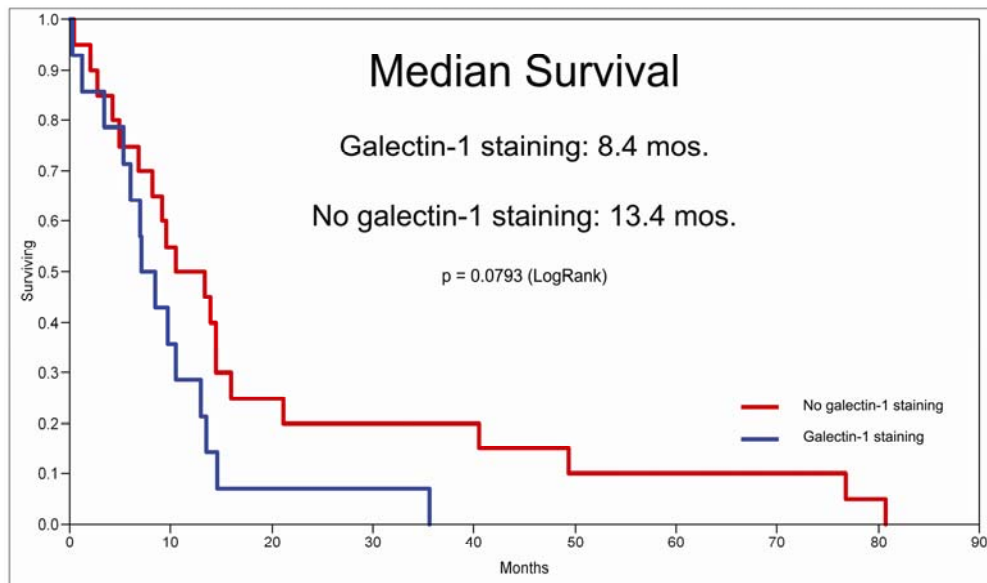

**Supplemental Figure 1 . Galectin-1 staining correlates with patient survival.** Using a tissue microarray created at Mayo Clinic, we stained glioblastoma samples from 34 separate patients using immunohistochemistry for galectin-1. A survival analysis revealed a trend towards shorter survival in those patients harboring galectin-1 positive tumors.

# Median Survival

Galectin-1 staining: 8.4 mos.

No galectin-1 staining: 13.4 mos.

$p = 0.0793$  (LogRank)

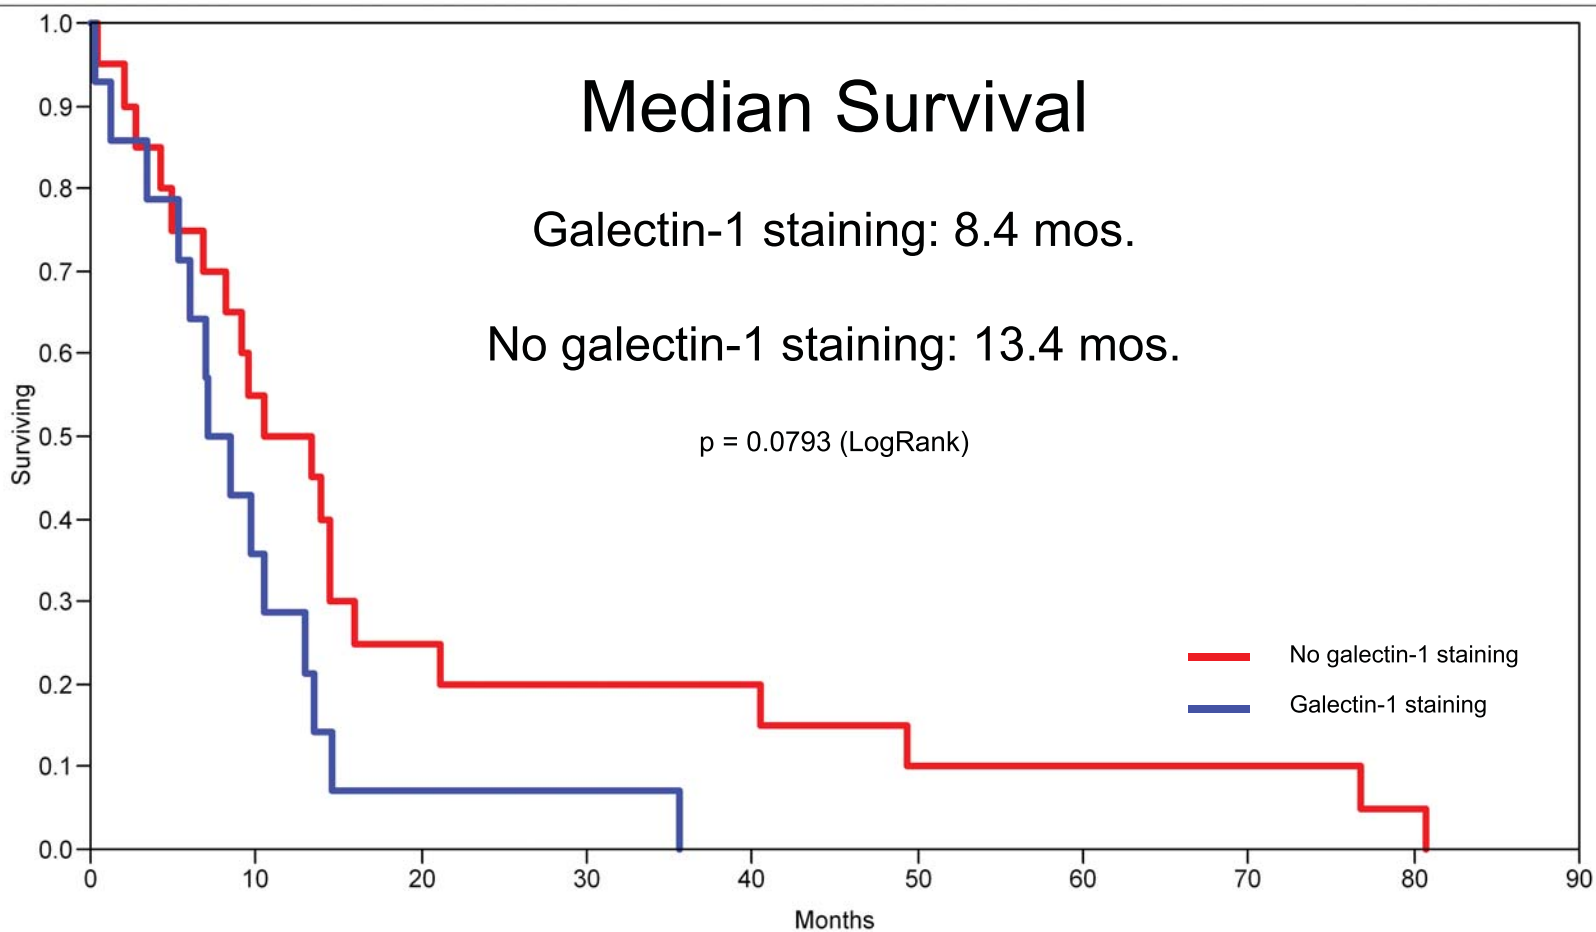

Supplement: MOESM1 [file 9552100]
